# Supplementary material for: Development of humidity-responsive self-healing zwitterionic polyurethanes for renewable shape memory applications
Source: Royal Society of Chemistry journal article supplement (doi:10.1039/c7ra05212j), 2017-01-01
Supplement: c7ra05212j1.pdf [file c7ra05212j1.pdf]

## Development of humidity-responsive self-healing zwitterionic polyurethanes for renewable shape memory applications

Hao Wen<sup>1</sup>, Shaojun Chen\*<sup>1</sup>, Zaochuan Ge<sup>1</sup>, Haitao Zhuo\*<sup>2</sup>, Jinlong Ling<sup>3</sup>, Qiao Liu<sup>3</sup>,

<sup>1</sup>Guangdong Research Center for Interfacial Engineering of Functional Materials; Shenzhen Key Laboratory of Special Functional Materials, College of Materials Science and Engineering, Shenzhen University, Shenzhen 518060, China.

<sup>2</sup>Shenzhen Key Laboratory of Functional Polymer, College of Chemistry and Environmental Engineering, Shenzhen University, Shenzhen, 518060, China.

\*Corresponding author: Tel and Fax: +86-755-26534562. E-mail: S.J.Chen, chensj@szu.edu.cn; H.T.Zhuo haitaozhuo@163.com

### Supporting information

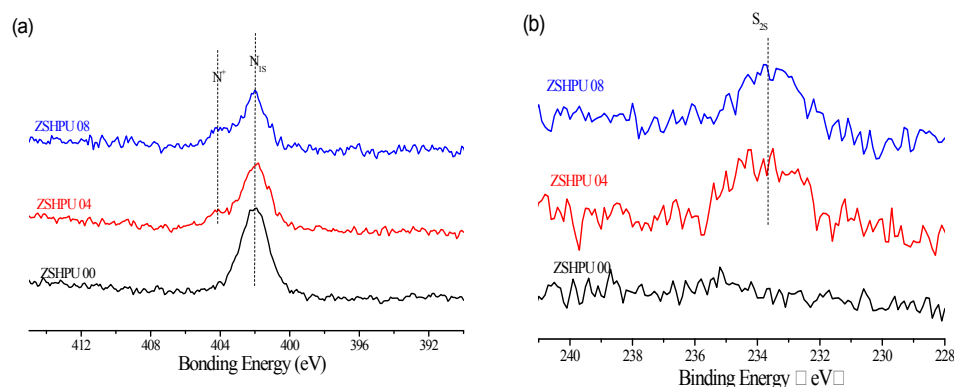

Figure S1. XPS spectra of pyridine based zwitterionic polymers

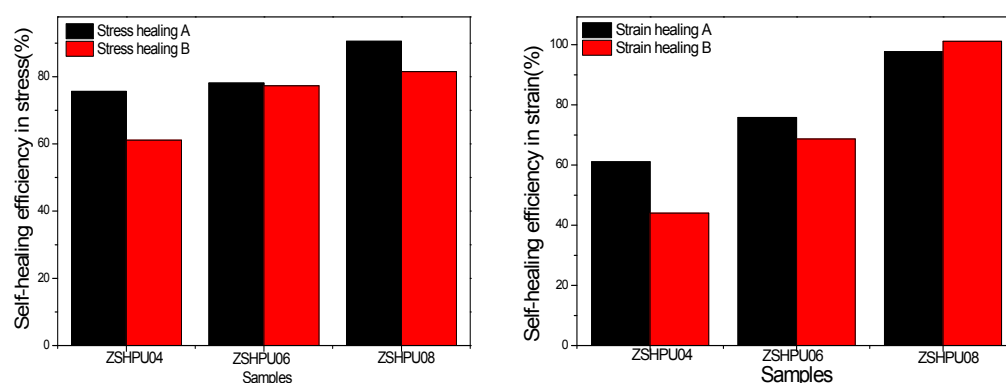

Figure S2. Self-healing efficiency in stress (a) and Strain (b) after the first self-healing and the second self-healing for pyridine based zwitterionic polymers with different BINAPS content

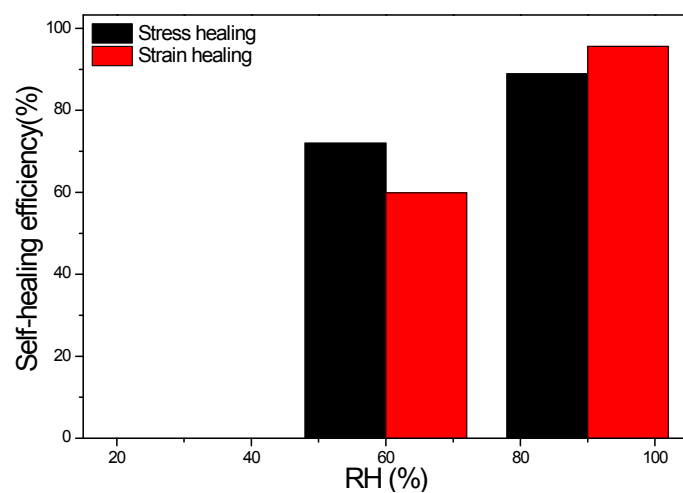

Figure S3. Self-healing efficiency in stress and Strain for pyridine based zwitterionic polymers under different RH condition
